# Supplementary material
Source: publisher figshare collection journal article supplement (https://acs.figshare.com/ndownloader/files/18134162)
Supplement: Supplementary file 1 [file 18134162]

## Supplementary Information

### Calculating Resin Functionalization in Solid-Phase Peptide Synthesis Using a Standardized Method based on Fmoc Determination

Othman Al Musaimi,<sup>1,2</sup> Alessandra Basso,<sup>3</sup> Beatriz G. de la Torre<sup>2\*</sup>, Fernando Albericio<sup>1,4,5\*</sup>

<sup>1</sup>Peptide Science Laboratory, School of Chemistry and Physics, University of KwaZulu-Natal, Durban 4001, South Africa; <sup>2</sup>KwaZulu-Natal Research Innovation and Sequencing Platform (KRISP), School of Laboratory Medicine and Medical Sciences, College of Health Sciences, University of KwaZulu-Natal, Durban 4041, South Africa; <sup>3</sup>Purolite, Llantrisant Business Park, Llantrisant, CF72 8LF, United Kingdom; and <sup>4</sup>CIBER-BBN, Networking Centre on Bioengineering, Biomaterials and Nanomedicine, Barcelona Science Park, University of Barcelona, 08028 Barcelona, Spain; <sup>5</sup>Department of Organic Chemistry, University of Barcelona, 08028 Barcelona, Spain

\* Correspondence: albericio@ukzn.ac.za (F.A.); garciadelatorreb@ukzn.ac.za (B.G.d.I.T.); Tel.: +27-614009144 (F.A.); +27-614047528 (B.G.d.I.T.)

Received: date; Accepted: date; Published: date

**Table S1.** Stability of analytical solution (freshly prepared vs. one day old at rt).

| No. | Fmoc-Amino acid | Fresh reading | After 1 day | % Difference |
|-----|-----------------|---------------|-------------|--------------|
| 1   | Gly             | 1.763         | 1.908       | 8.2          |
| 2   | Ala             | 1.764         | 2.144       | 21.5         |
| 3   | Ser             | 1.854         | 2.152       | 16.1         |
| 4   | Thr             | 1.992         | 2.263       | 13.6         |
| 5   | Cys             | 0.817         | 1.635       | 22.4         |
| 6   | Phe             | 1.370         | 1.792       | 30.8         |
| 7   | Val             | 2.184         | 2.382       | 9.1          |
| 8   | Trp             | 1.297         | 1.508       | 16.3         |
| 9   | His             | 0.746         | 1.635       | 14.7         |
| 10  | Leu             | 1.451         | 1.602       | 10.4         |
| 11  | Lys             | 1.493         | 1.641       | 9.9          |
| 12  | Ile             | 1.539         | 1.749       | 13.6         |
| 13  | Tyr             | 1.695         | 1.913       | 12.9         |
| 14  | Pro             | 1.655         | 1.679       | 1.5          |
| 15  | Met             | 2.068         | 2.347       | 13.5         |
| 16  | Glu             | 1.912         | 2.085       | 9.0          |
| 17  | Gln             | 0.918         | 1.299       | 41.5         |
| 18  | Arg             | 0.900         | 1.053       | 17.0         |

## **Experimental details**

### **Materials and methods**

All reagents and solvents were obtained from commercial suppliers and were used without further purification unless otherwise stated. UV tests were performed on Shimadzu UV3600 spectrophotometer.

### **Incorporation procedure**

All the selected Fmoc-amino acids were incorporated separately onto the Wang resin by  $\text{CH}_2\text{Cl}_2$ .

A known amount of Wang resin (Purolite) was swollen in the corresponding solvent for 10-20 min, and then 5 equiv. of each Fmoc-amino acid was dissolved in a minimum amount of  $\text{CH}_2\text{Cl}_2$  (0.5 mL/50 mg resin) and sonicated for 10 min, and then 0.25 equiv. of DMAP was added to the previously swollen resin. Then, the Fmoc-amino acid solution was added to it (resin + DMAP). Finally, 2.5 equiv. of DIC was added to the resin mixture. The resulting mixture was allowed to react under mechanical shaking for 1 h at rt. Immediately after, the resin was washed twice with  $\text{CH}_2\text{Cl}_2$ . A capping solution consisting of acetic anhydride and DIEA (10:20) equiv. was then added to endcap any unreacted hydroxyl groups of the Wang resin and allowed to react for 30 min under mechanical shaking. Finally, the resin was washed twice with  $\text{CH}_2\text{Cl}_2$  and dried under vacuum.
